# Supplementary material for: Nanozyme enhanced magnetic immunoassay for dual-mode detection of gastrin-17
Source: Royal Society of Chemistry journal article supplement (doi:10.1039/d2an00063f), 2022-01-01
Supplement: d2an00063f1.pdf [file d2an00063f1.pdf]

## Supporting Information

### Nanozyme Enhanced Magnetic Immunoassay for Dual-mode Detection of Gastrin-17

Chujun Zheng<sup>1,#</sup>, Qixia Jiang<sup>2,#</sup>, Kan Wang<sup>1\*</sup>, Tangan Li<sup>1</sup>, Wei Zheng<sup>1</sup>,  
Yuemeng Cheng<sup>1</sup>, Qihong Ning<sup>1</sup>, Daxiang Cui<sup>1</sup>

<sup>1</sup>Department of Instrument Science and Engineering, School of Electronic Information and Electrical Engineering, Shanghai Jiao Tong University, Shanghai Engineering Research Center for Intelligent Diagnosis and treatment instrument, Key Laboratory of Thin Film and Microfabrication Technology (Ministry of Education), Shanghai 200240, China.

<sup>2</sup> Department of Cardiology, Tongren Hospital, Shanghai Jiao Tong University School of Medicine, 1111 XianXia Road, Shanghai, 200336, China.

<sup>#</sup>Equal contributors

\*Corresponding authors: Kan Wang: wk\_xa@163.com

Co-authors Email: Chujun Zheng: shulanzcj@sjtu.edu.cn

Qixia Jiang : jqx4312@shtrhospital.com

Tangan Li: andrew11234@sjtu.edu.cn

Wei Zheng: zheng-wei@sjtu.edu.cn

Yuemeng Cheng: ym\_cheng@sjtu.edu.cn

Qihong Ning: nqihong\_a@sjtu.edu.cn

Daxiang Cui: dx cui@sjtu.edu.cn

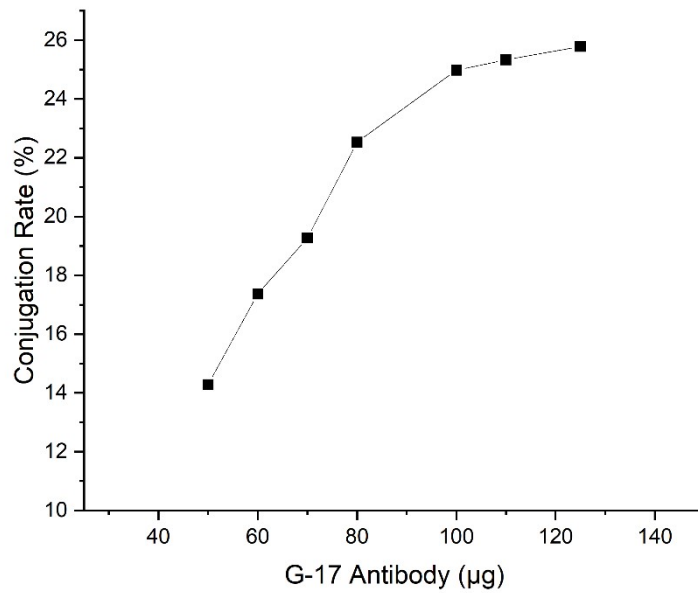

**Fig. S1.** Effect of the antibody amount on the conjugation rate of  $\text{Fe}_3\text{O}_4@\text{Pt}$  probes

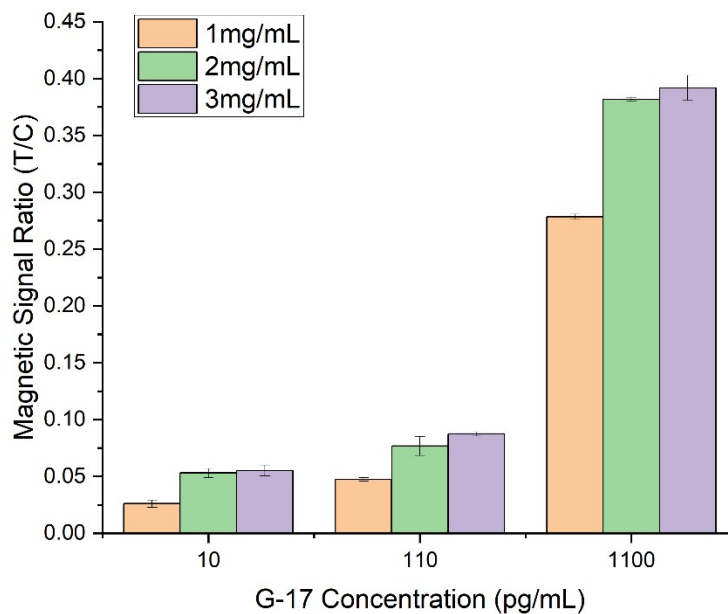

**Fig. S2.** Magnetic signal ratio (T line/C line) for G-17 detecting by LFAs with different concentrations of coating antibody on the T line (1.0, 2.0, 3.0 mg/mL)

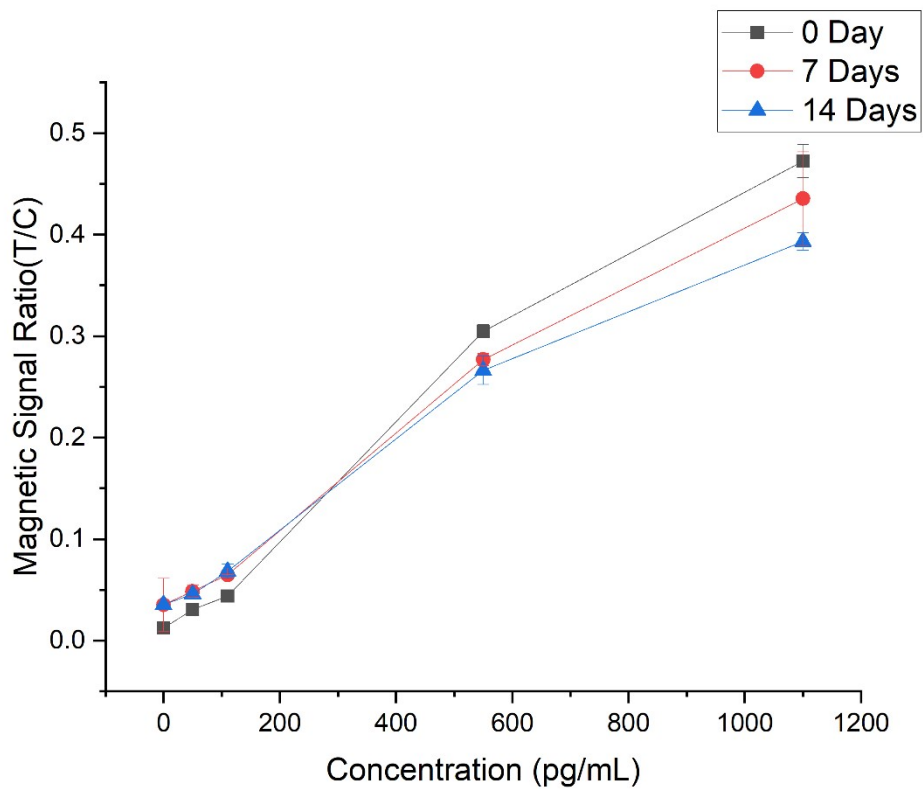

**Fig. S3.** Magnetic signal ratio (T line/C line) for G-17 detecting with  $\text{Fe}_3\text{O}_4@\text{Pt}$ -based LFAs using the same lot of probes before and after 7 days and 14 days storage.
